# Supplementary material for: Red blood cell transfusion induces abnormal HIF-1α response to cytokine storm after adult cardiac surgery
Source: PubMed Central journal article supplement (PMC8592994; doi:10.1038/s41598-021-01695-4), 2021-11-15
Supplement: 41598_2021_1695_MOESM1_ESM.pdf [file 41598_2021_1695_MOESM1_ESM.pdf]

## **SUPPLEMENTAL MATERIAL**

### **Red blood cell transfusion induces abnormal HIF-1 $\alpha$ response to cytokine storm after adult cardiac surgery**

Emma Viikinkoski, MD<sup>1</sup>, Juho Jalkanen, MD, PhD<sup>2</sup>, Jarmo Gunn, MD, PhD, Prof<sup>1</sup>, Tuija Vasankari, RA<sup>1</sup>, Joonas Lehto, MD, PhD<sup>1</sup>, Mika Valtonen, MD, PhD,<sup>3</sup> Fausto Biancari, MD, PhD, Prof,<sup>1,5,6</sup> Sirpa Jalkanen, MD, PhD, Prof<sup>2</sup>, K E Juhani Airaksinen, MD, PhD, Prof<sup>1</sup>, Maija Hollmén, PhD, Doc<sup>2</sup>, and Tuomas O Kiviniemi, MD, PhD, FESC<sup>1,4</sup> \*

**Supplemental Table I.** Association between clinical and operative variables and postoperative logHIF-1 $\alpha$  (N=262). Linear regression.

|                                              | Univariate analysis |      |         |        |      | Multivariate analysis |      |
|----------------------------------------------|---------------------|------|---------|--------|------|-----------------------|------|
|                                              | B                   | SE   | $\beta$ | t      | P    | $\beta$               | P    |
| Age                                          | -.004               | .003 | -.073   | -1.173 | .242 | NP                    |      |
| Preoperative eGFR                            | .002                | .002 | .079    | 1.265  | .207 | NP                    |      |
| BMI                                          | .017                | .008 | .139    | 2.248  | .025 | .062                  | .363 |
| Female                                       | -.062               | .088 | -.044   | -.708  | .480 | NP                    |      |
| Preoperative atrial fibrillation             | -.001               | .085 | .000    | -.008  | .994 | NP                    |      |
| Permanent                                    | -.118               | .123 | -.059   | -.958  | .339 | NP                    |      |
| Paroxysmal                                   | .345                | .171 | .125    | 2.024  | .044 | .038                  | .571 |
| Coronary artery disease                      | .080                | .073 | .068    | 1.103  | .271 | NP                    |      |
| Previous myocardial infarction               | .207                | .082 | .155    | 2.538  | .012 | .128                  | .190 |
| Recent myocardial infarction                 | .196                | .101 | .120    | 1.944  | .053 | NP                    |      |
| Treatment for dyslipidemia                   | .173                | .075 | .142    | 2.310  | .022 | .132                  | .112 |
| Prior PCI                                    | .115                | .170 | .042    | .676   | .500 | NP                    |      |
| Prior CABG                                   | -                   | -    | -       | -      | -    | NP                    |      |
| Prior aortic valve surgery                   | -.244               | .219 | -.069   | -1.111 | .268 | NP                    |      |
| Prior mitral valve surgery                   | .113                | .407 | .017    | .278   | .781 | NP                    |      |
| Previous TAVR                                | .224                | .575 | .024    | .390   | .697 | NP                    |      |
| Previous percutaneous mitral valve procedure | -                   | -    | -       | -      | -    | NP                    |      |
| Treatment for diabetes II                    | .058                | .082 | .044    | .710   | .478 | NP                    |      |
| Treatment for diabetes I                     | .196                | .169 | .072    | 1.158  | .248 | NP                    |      |
| Treatment for hypertension                   | -.011               | .089 | -.008   | -.127  | .899 | NP                    |      |
| Heart failure                                | .072                | .102 | .044    | .703   | .482 | NP                    |      |
| Previous stroke                              | .143                | .114 | .077    | 1.251  | .212 | NP                    |      |
| Carotid artery disease                       | -.565               | .217 | -.159   | -2.604 | .010 | -.112                 | .099 |
| Peripheral artery disease                    | -.066               | .177 | -.023   | -.374  | .708 | NP                    |      |
| Active endocarditis                          | .544                | .406 | .083    | 1.340  | .182 | NP                    |      |
| Previous endocarditis                        | -.105               | .333 | -.020   | -.315  | .753 | NP                    |      |
| Hepatic cirrhosis                            | .056                | .575 | .006    | .097   | .923 | NP                    |      |

|                                   |       |      |       |        |      |       |      |
|-----------------------------------|-------|------|-------|--------|------|-------|------|
| Pulmonary artery hypertension     | .056  | .076 | .046  | .742   | .459 | NP    |      |
| Chronic lung disease              | -.041 | .113 | -.023 | -.367  | .714 | NP    |      |
| Active smoking                    | .170  | .092 | .114  | 1.840  | .067 | NP    |      |
| Ex-smoker                         | -.037 | .070 | -.033 | -.534  | .594 | NP    |      |
| Obstructive sleep apnea           | .004  | .123 | .002  | .035   | .972 | NP    |      |
| CPAP mask                         | -.083 | .163 | -.031 | -.507  | .613 | NP    |      |
| Inflammatory bowel disease        | .129  | .206 | .039  | .626   | .532 | NP    |      |
| Psoriatic arthropathy             | .104  | .237 | .027  | .438   | .662 | NP    |      |
| Skin disease                      | -.009 | .116 | -.005 | -.081  | .936 | NP    |      |
| Seropositive rheumatoid arthritis | .183  | .289 | .039  | .633   | .527 | NP    |      |
| Seronegative rheumatoid arthritis | .015  | .259 | .004  | .057   | .955 | NP    |      |
| SLE/ LED                          | .101  | .575 | .011  | .176   | .860 | NP    |      |
| Hypothyroidism                    | -.313 | .124 | -.155 | -2.531 | .012 | -.137 | .048 |
| Hyperthyroidism                   | -     | -    | -     | -      | -    | NP    |      |
| Malignancy                        | -.087 | .101 | -.054 | -.868  | .386 | NP    |      |
| Active                            | -.344 | .288 | -.074 | -1.192 | .235 | NP    |      |
| Remission                         | -.077 | .104 | -.046 | -.737  | .462 | NP    |      |
| Poor mobility                     | -     | -    | -     | -      | -    | NP    |      |
| Connective tissue disease         | -.250 | .256 | -.061 | -.974  | .331 | NP    |      |
| Chronic dialysis                  | .120  | .286 | .026  | .420   | .675 | NP    |      |

---

**Operation status:**

|                       |       |      |       |        |      |    |  |
|-----------------------|-------|------|-------|--------|------|----|--|
| Elective              | -.126 | .097 | -.080 | -1.292 | .197 | NP |  |
| Urgent                | .148  | .101 | .090  | 1.462  | .145 | NP |  |
| Emergency and salvage | -.092 | .289 | -.020 | -.318  | .751 | NP |  |

**Operation type:**

|                                 |       |      |       |        |      |       |      |
|---------------------------------|-------|------|-------|--------|------|-------|------|
| AVR (bioprosthesis/ mechanical) | -.069 | .075 | -.057 | -.929  | .354 | NP    |      |
| MPL                             | -.114 | .130 | -.054 | -.876  | .382 | NP    |      |
| MVR                             | -.102 | .185 | -.034 | -.550  | .583 | NP    |      |
| CABG                            | .130  | .072 | .112  | 1.809  | .072 | NP    |      |
| Only CABG                       | .166  | .071 | .145  | 2.355  | .019 | -.015 | .865 |
| Surgery on ascending aorta      | -.067 | .117 | -.036 | -.578  | .564 | NP    |      |
| DAVID procedure                 | -     | -    | -     | -      | -    | NP    |      |
| Bentall procedure               | -.074 | .148 | -.031 | -.502  | .616 | NP    |      |
| MAZE procedure                  | .106  | .220 | .030  | .485   | .628 | NP    |      |
| Pericardiectomy                 | -.474 | .332 | -.088 | -1.428 | .154 | NP    |      |
| LAA closure                     | .108  | .105 | .064  | 1.030  | .304 | NP    |      |

|                                             |           |      |       |        |      |       |      |
|---------------------------------------------|-----------|------|-------|--------|------|-------|------|
| Other procedure                             | -         | -    | -     | -      | -    | NP    |      |
| <b>Indication for CABG:</b>                 |           |      |       |        |      |       |      |
| Stable                                      | .009      | .075 | .007  | .116   | .908 | NP    |      |
| UAP                                         | -.011     | .117 | -.006 | -.096  | .924 | NP    |      |
| NSTEMI                                      | .205      | .097 | .130  | 2.119  | .035 | .018  | .852 |
| STEMI                                       | .431      | .406 | .066  | 1.061  | .289 | NP    |      |
| <b>Operation specifics:</b>                 |           |      |       |        |      |       |      |
| Operation length (min)                      | 3.163E-5  | .000 | .010  | .149   | .882 | NP    |      |
| Aortic cross-clamping time (min)            | -.002     | .001 | -.088 | -1.412 | .159 | NP    |      |
| Cardiopulmonary bypass time (min)           | .000      | .000 | -.042 | -.677  | .499 | NP    |      |
| Cardioplegia Antegrade                      | -.105     | .289 | -.023 | -.362  | .717 | NP    |      |
| Cardioplegia Retrograde                     | -.116     | .076 | -.095 | -1.528 | .128 | NP    |      |
| Endoscopic vein harvest                     | .297      | .257 | .072  | 1.154  | .250 | NP    |      |
| DHCA                                        | -.304     | .287 | -.066 | -1.058 | .291 | NP    |      |
| Delayed ventilation                         | -.034     | .122 | -.017 | -.275  | .783 | NP    |      |
| Time in ventilator (hours)                  | -.001     | .000 | -.119 | -1.924 | .055 | NP    |      |
| ECMO                                        | .000      | .575 | .000  | -.001  | .999 | NP    |      |
| IABP treatment                              | .187      | .258 | .045  | .724   | .469 | NP    |      |
| Noradrenalin infusion                       | -.144     | .332 | -.027 | -.433  | .665 | NP    |      |
| Adrenalin infusion                          | -.150     | .136 | -.069 | -1.107 | .269 | NP    |      |
| Milrinone                                   | -.006     | .087 | -.004 | -.064  | .949 | NP    |      |
| Levosimendan                                | .027      | .087 | .019  | .307   | .759 | NP    |      |
| Caprilon                                    | -         | -    | -     | -      | -    | NP    |      |
| Coagulation factor VIIa                     | -.107     | .407 | -.016 | -.262  | .794 | NP    |      |
| Coagulation factor VIII                     | -.288     | .575 | -.031 | -.501  | .617 | NP    |      |
| Coagulation factor XIII                     | -.163     | .085 | -.118 | -1.917 | .056 | NP    |      |
| Human fibrinogen                            | -.481     | .235 | -.126 | -2.047 | .042 | NP    |      |
| <b>Blood products administered 12 hours</b> |           |      |       |        |      |       |      |
| <b>perioperatively:</b>                     |           |      |       |        |      |       |      |
| Packed red blood cells                      | -.241     | .085 | -.190 | -2.830 | .005 | -.151 | .037 |
| Fresh frozen plasma                         | -.568     | .080 | -.405 | -7.138 | .000 | NP    |      |
| Platelets                                   | -.184     | .082 | -.139 | -2.255 | .025 | NP    |      |
| <b>Intensive care unit:</b>                 |           |      |       |        |      |       |      |
| Length of stay (hours)                      | .003      | .005 | .034  | .541   | .589 | NP    |      |
| Total fluids (12h)                          | -4.932E-5 | .000 | -.161 | -2.620 | .009 | NP    |      |
| Drain tube bleed (12h)                      | -9.499E-5 | .000 | -.121 | -1.963 | .051 | NP    |      |
| Diuresis (12h)                              | -7.984E-5 | .000 | -.097 | -1.566 | .119 | NP    |      |

AVR: aortic valve replacement; BMI: body-mass-index; CABG: coronary artery bypass grafting; CPAP: continuous positive airway pressure;  
DHCA: deep hypothermic circulatory arrest; ECMO: extracorporeal membrane oxygenation; eGFR: estimated glomerular filtration rate;  
IABP: intra-aortic balloon-pump; LAA: left atrial appendage; LED: lupus erythematosus disseminatus; MPL: mitral valve plasty; MVR: mitral  
valve replacement; NSTEMI: non ST-elevation myocardial infarction; PCI: percutaneous coronary intervention; SLE: systemic lupus  
erythematosus; STEMI: ST-elevation myocardial infarction; TAVR: transcatheter aortic valve implantation; UAP: unstable angina pectoralis

---

**Supplementary Table for review.** Table shows multivariable logistic regression analysis of A) in-hospital adverse events; and B) 90d adverse events.

A)

|                            |                            | Variables in the Equation |       |        |       |       |        |       | 95% C.I. for EXP(B) |       |
|----------------------------|----------------------------|---------------------------|-------|--------|-------|-------|--------|-------|---------------------|-------|
|                            |                            | B                         | S.E.  | Wald   | df    | Sig.  | Exp(B) | Lower | Upper               |       |
| Step 1 <sup>a</sup>        | female_male                | -.395                     | .494  | .639   | 1     | .424  | .674   | .256  | 1.773               |       |
|                            | age_calculated             | .032                      | .020  | 2.646  | 1     | .104  | 1.033  | .993  | 1.073               |       |
|                            | Log_deltaHIF               | -.969                     | .367  | 6.987  | 1     | .008  | .379   | .185  | .778                |       |
|                            | treatment_for_diabetes     | -.178                     | .397  | .201   | 1     | .654  | .837   | .384  | 1.822               |       |
|                            | treatment_for_hypertension | .182                      | .467  | .153   | 1     | .696  | 1.200  | .481  | 2.994               |       |
|                            | heart_failure              | .749                      | .459  | 2.661  | 1     | .103  | 2.114  | .860  | 5.197               |       |
|                            | pre.op_atrial_fibrillation | -.386                     | .443  | .758   | 1     | .384  | .680   | .285  | 1.621               |       |
|                            | coronary_artery_disease    | -.200                     | .394  | .258   | 1     | .611  | .819   | .378  | 1.772               |       |
|                            | bmi                        | .020                      | .038  | .275   | 1     | .600  | 1.020  | .947  | 1.099               |       |
|                            | preop_eGFR                 | .013                      | .009  | 2.282  | 1     | .131  | 1.013  | .996  | 1.031               |       |
| Constant                   | -5.409                     | 2.071                     | 6.820 | 1      | .009  | .004  |        |       |                     |       |
| Step 2 <sup>a</sup>        | female_male                | -.385                     | .493  | .609   | 1     | .435  | .681   | .259  | 1.789               |       |
|                            | age_calculated             | .033                      | .020  | 2.812  | 1     | .094  | 1.033  | .994  | 1.074               |       |
|                            | Log_deltaHIF               | -.967                     | .366  | 6.972  | 1     | .008  | .380   | .186  | .779                |       |
|                            | treatment_for_diabetes     | -.167                     | .396  | .178   | 1     | .673  | .846   | .389  | 1.839               |       |
|                            | heart_failure              | .757                      | .458  | 2.725  | 1     | .099  | 2.131  | .868  | 5.235               |       |
|                            | pre.op_atrial_fibrillation | -.380                     | .443  | .736   | 1     | .391  | .684   | .287  | 1.630               |       |
|                            | coronary_artery_disease    | -.163                     | .384  | .180   | 1     | .671  | .850   | .401  | 1.802               |       |
|                            | bmi                        | .021                      | .038  | .302   | 1     | .583  | 1.021  | .948  | 1.100               |       |
|                            | preop_eGFR                 | .013                      | .009  | 2.198  | 1     | .138  | 1.013  | .996  | 1.030               |       |
|                            | Constant                   | -5.347                    | 2.059 | 6.743  | 1     | .009  | .005   |       |                     |       |
| Step 3 <sup>a</sup>        | female_male                | -.370                     | .491  | .566   | 1     | .452  | .691   | .264  | 1.809               |       |
|                            | age_calculated             | .032                      | .019  | 2.721  | 1     | .099  | 1.033  | .994  | 1.073               |       |
|                            | Log_deltaHIF               | -.960                     | .365  | 6.905  | 1     | .009  | .383   | .187  | .784                |       |
|                            | heart_failure              | .736                      | .455  | 2.614  | 1     | .106  | 2.088  | .855  | 5.099               |       |
|                            | pre.op_atrial_fibrillation | -.363                     | .441  | .676   | 1     | .411  | .696   | .293  | 1.652               |       |
|                            | coronary_artery_disease    | -.201                     | .373  | .291   | 1     | .590  | .818   | .394  | 1.698               |       |
|                            | bmi                        | .016                      | .036  | .197   | 1     | .657  | 1.016  | .947  | 1.091               |       |
|                            | preop_eGFR                 | .013                      | .009  | 2.144  | 1     | .143  | 1.013  | .996  | 1.030               |       |
|                            | Constant                   | -5.165                    | 1.999 | 6.678  | 1     | .010  | .006   |       |                     |       |
|                            | Step 4 <sup>a</sup>        | female_male               | -.362 | .491   | .544  | 1     | .461   | .696  | .266                | 1.822 |
| age_calculated             |                            | .031                      | .019  | 2.617  | 1     | .106  | 1.032  | .993  | 1.071               |       |
| Log_deltaHIF               |                            | -.950                     | .364  | 6.816  | 1     | .009  | .387   | .190  | .789                |       |
| heart_failure              |                            | .724                      | .454  | 2.537  | 1     | .111  | 2.062  | .846  | 5.026               |       |
| pre.op_atrial_fibrillation |                            | -.354                     | .441  | .645   | 1     | .422  | .702   | .296  | 1.665               |       |
| coronary_artery_disease    |                            | -.184                     | .371  | .246   | 1     | .620  | .832   | .402  | 1.721               |       |
| preop_eGFR                 |                            | .012                      | .009  | 2.097  | 1     | .148  | 1.013  | .996  | 1.030               |       |
| Constant                   |                            | -4.643                    | 1.596 | 8.460  | 1     | .004  | .010   |       |                     |       |
| Step 5 <sup>a</sup>        |                            | female_male               | -.301 | .475   | .402  | 1     | .526   | .740  | .292                | 1.878 |
|                            |                            | age_calculated            | .028  | .019   | 2.364 | 1     | .124   | 1.029 | .992                | 1.067 |
|                            | Log_deltaHIF               | -.965                     | .362  | 7.087  | 1     | .008  | .381   | .187  | .775                |       |
|                            | heart_failure              | .737                      | .454  | 2.636  | 1     | .104  | 2.090  | .858  | 5.087               |       |
|                            | pre.op_atrial_fibrillation | -.319                     | .436  | .534   | 1     | .465  | .727   | .309  | 1.709               |       |
|                            | preop_eGFR                 | .012                      | .009  | 2.126  | 1     | .145  | 1.013  | .996  | 1.030               |       |
|                            | Constant                   | -4.616                    | 1.596 | 8.364  | 1     | .004  | .010   |       |                     |       |
| Step 6 <sup>a</sup>        | age_calculated             | .027                      | .018  | 2.174  | 1     | .140  | 1.027  | .991  | 1.065               |       |
|                            | Log_deltaHIF               | -.984                     | .361  | 7.443  | 1     | .006  | .374   | .184  | .758                |       |
|                            | heart_failure              | .732                      | .453  | 2.615  | 1     | .106  | 2.080  | .856  | 5.053               |       |
|                            | pre.op_atrial_fibrillation | -.272                     | .429  | .403   | 1     | .525  | .761   | .328  | 1.765               |       |
|                            | preop_eGFR                 | .014                      | .008  | 2.601  | 1     | .107  | 1.014  | .997  | 1.030               |       |
| Constant                   | -4.655                     | 1.586                     | 8.612 | 1      | .003  | .010  |        |       |                     |       |
| Step 7 <sup>a</sup>        | age_calculated             | .025                      | .018  | 1.921  | 1     | .166  | 1.025  | .990  | 1.062               |       |
|                            | Log_deltaHIF               | -.960                     | .359  | 7.170  | 1     | .007  | .383   | .189  | .773                |       |
|                            | heart_failure              | .656                      | .437  | 2.258  | 1     | .133  | 1.928  | .819  | 4.538               |       |
|                            | preop_eGFR                 | .014                      | .008  | 2.577  | 1     | .108  | 1.014  | .997  | 1.030               |       |
|                            | Constant                   | -4.550                    | 1.573 | 8.366  | 1     | .004  | .011   |       |                     |       |
| Step 8 <sup>a</sup>        | Log_deltaHIF               | -.965                     | .359  | 7.220  | 1     | .007  | .381   | .188  | .770                |       |
|                            | heart_failure              | .641                      | .436  | 2.167  | 1     | .141  | 1.899  | .809  | 4.458               |       |
|                            | preop_eGFR                 | .009                      | .008  | 1.330  | 1     | .249  | 1.009  | .994  | 1.024               |       |
|                            | Constant                   | -2.569                    | .637  | 16.259 | 1     | <.001 | .077   |       |                     |       |
| Step 9 <sup>a</sup>        | Log_deltaHIF               | -.932                     | .355  | 6.882  | 1     | .009  | .394   | .196  | .790                |       |
|                            | heart_failure              | .557                      | .428  | 1.695  | 1     | .193  | 1.746  | .755  | 4.039               |       |
|                            | Constant                   | -1.888                    | .209  | 81.837 | 1     | <.001 | .151   |       |                     |       |
| Step 10 <sup>a</sup>       | Log_deltaHIF               | -.907                     | .354  | 6.578  | 1     | .010  | .404   | .202  | .807                |       |
|                            | Constant                   | -1.792                    | .190  | 88.872 | 1     | <.001 | .167   |       |                     |       |

a. Variable(s) entered on step 1: female\_male, age\_calculated, Log\_deltaHIF, treatment\_for\_diabetes, treatment\_for\_hypertension, heart\_failure, pre.op\_atrial\_fibrillation, coronary\_artery\_disease, bmi, preop\_eGFR.

B)

**Variables in the Equation**

|                            |                            | B                          | S.E.          | Wald   | df     | Sig.   | Exp(B) | 95% C.I. for EXP(B) |       |       |       |
|----------------------------|----------------------------|----------------------------|---------------|--------|--------|--------|--------|---------------------|-------|-------|-------|
|                            |                            |                            |               |        |        |        |        | Lower               | Upper |       |       |
| Step 1 <sup>a</sup>        | female_male                | -.177                      | .435          | .166   | 1      | .684   | .838   | .357                | 1.966 |       |       |
|                            | age_calculated             | .028                       | .018          | 2.276  | 1      | .131   | 1.028  | .992                | 1.066 |       |       |
|                            | Log_deltaHIF               | -.761                      | .351          | 4.689  | 1      | .030   | .467   | .235                | .930  |       |       |
|                            | treatment_for_diabetes     | .009                       | .366          | .001   | 1      | .981   | 1.009  | .493                | 2.065 |       |       |
|                            | treatment_for_hypertension | .357                       | .454          | .620   | 1      | .431   | 1.430  | .587                | 3.481 |       |       |
|                            | heart_failure              | .731                       | .426          | 2.943  | 1      | .086   | 2.078  | .901                | 4.792 |       |       |
|                            | pre.op_atrial_fibrillation | -.308                      | .410          | .562   | 1      | .453   | .735   | .329                | 1.643 |       |       |
|                            | coronary_artery_disease    | -.269                      | .368          | .531   | 1      | .466   | .764   | .371                | 1.574 |       |       |
|                            | bmi                        | .029                       | .035          | .703   | 1      | .402   | 1.030  | .961                | 1.103 |       |       |
|                            | preop_eGFR                 | .007                       | .008          | .678   | 1      | .410   | 1.007  | .991                | 1.023 |       |       |
|                            | Constant                   | -4.861                     | 1.922         | 6.393  | 1      | .011   | .008   |                     |       |       |       |
| Step 2 <sup>a</sup>        | female_male                | -.178                      | .434          | .168   | 1      | .682   | .837   | .357                | 1.960 |       |       |
|                            | age_calculated             | .028                       | .018          | 2.291  | 1      | .130   | 1.028  | .992                | 1.066 |       |       |
|                            | Log_deltaHIF               | -.761                      | .351          | 4.703  | 1      | .030   | .467   | .235                | .929  |       |       |
|                            | treatment_for_hypertension | .358                       | .453          | .624   | 1      | .430   | 1.431  | .588                | 3.479 |       |       |
|                            | heart_failure              | .732                       | .424          | 2.984  | 1      | .084   | 2.080  | .906                | 4.775 |       |       |
|                            | pre.op_atrial_fibrillation | -.309                      | .408          | .572   | 1      | .450   | .734   | .330                | 1.634 |       |       |
|                            | coronary_artery_disease    | -.267                      | .359          | .552   | 1      | .457   | .766   | .379                | 1.547 |       |       |
|                            | bmi                        | .030                       | .033          | .781   | 1      | .377   | 1.030  | .965                | 1.100 |       |       |
|                            | preop_eGFR                 | .007                       | .008          | .682   | 1      | .409   | 1.007  | .991                | 1.023 |       |       |
|                            | Constant                   | -4.869                     | 1.888         | 6.651  | 1      | .010   | .008   |                     |       |       |       |
|                            | Step 3 <sup>a</sup>        | age_calculated             | .026          | .018   | 2.151  | 1      | .142   | 1.027               | .991  | 1.064 |       |
| Log_deltaHIF               |                            | -.776                      | .349          | 4.947  | 1      | .026   | .460   | .232                | .912  |       |       |
| treatment_for_hypertension |                            | .351                       | .453          | .600   | 1      | .438   | 1.421  | .584                | 3.454 |       |       |
| heart_failure              |                            | .736                       | .424          | 3.018  | 1      | .082   | 2.087  | .910                | 4.789 |       |       |
| pre.op_atrial_fibrillation |                            | -.277                      | .401          | .477   | 1      | .490   | .758   | .346                | 1.663 |       |       |
| coronary_artery_disease    |                            | -.227                      | .346          | .431   | 1      | .512   | .797   | .404                | 1.571 |       |       |
| bmi                        |                            | .029                       | .033          | .758   | 1      | .384   | 1.030  | .964                | 1.099 |       |       |
| preop_eGFR                 |                            | .007                       | .008          | .856   | 1      | .355   | 1.007  | .992                | 1.023 |       |       |
| Constant                   |                            | -4.874                     | 1.884         | 6.694  | 1      | .010   | .008   |                     |       |       |       |
| Step 4 <sup>a</sup>        |                            | age_calculated             | .024          | .018   | 1.854  | 1      | .173   | 1.024               | .989  | 1.060 |       |
|                            |                            | Log_deltaHIF               | -.786         | .348   | 5.101  | 1      | .024   | .456                | .231  | .901  |       |
|                            | treatment_for_hypertension | .279                       | .438          | .406   | 1      | .524   | 1.322  | .560                | 3.121 |       |       |
|                            | heart_failure              | .750                       | .423          | 3.141  | 1      | .076   | 2.118  | .924                | 4.856 |       |       |
|                            | pre.op_atrial_fibrillation | -.244                      | .399          | .376   | 1      | .540   | .783   | .359                | 1.710 |       |       |
|                            | bmi                        | .028                       | .033          | .695   | 1      | .404   | 1.028  | .963                | 1.098 |       |       |
|                            | preop_eGFR                 | .007                       | .008          | .789   | 1      | .374   | 1.007  | .992                | 1.023 |       |       |
|                            | Constant                   | -4.750                     | 1.866         | 6.476  | 1      | .011   | .009   |                     |       |       |       |
|                            | Step 5 <sup>a</sup>        | age_calculated             | .022          | .017   | 1.623  | 1      | .203   | 1.022               | .988  | 1.057 |       |
|                            |                            | Log_deltaHIF               | -.764         | .346   | 4.871  | 1      | .027   | .466                | .236  | .918  |       |
|                            |                            | treatment_for_hypertension | .283          | .437   | .417   | 1      | .518   | 1.327               | .563  | 3.127 |       |
| heart_failure              |                            | .684                       | .409          | 2.797  | 1      | .094   | 1.982  | .889                | 4.421 |       |       |
| bmi                        |                            | .027                       | .033          | .659   | 1      | .417   | 1.027  | .963                | 1.096 |       |       |
| preop_eGFR                 |                            | .007                       | .008          | .774   | 1      | .379   | 1.007  | .992                | 1.023 |       |       |
| Constant                   |                            | -4.625                     | 1.845         | 6.285  | 1      | .012   | .010   |                     |       |       |       |
| Step 6 <sup>a</sup>        |                            | age_calculated             | .024          | .017   | 2.004  | 1      | .157   | 1.024               | .991  | 1.059 |       |
|                            |                            | Log_deltaHIF               | -.758         | .345   | 4.824  | 1      | .028   | .469                | .238  | .922  |       |
|                            |                            | heart_failure              | .689          | .409   | 2.847  | 1      | .092   | 1.992               | .895  | 4.438 |       |
|                            |                            | bmi                        | .029          | .033   | .780   | 1      | .377   | 1.030               | .965  | 1.098 |       |
|                            | preop_eGFR                 | .007                       | .008          | .692   | 1      | .405   | 1.007  | .991                | 1.022 |       |       |
|                            | Constant                   | -4.554                     | 1.831         | 6.182  | 1      | .013   | .011   |                     |       |       |       |
|                            | Step 7 <sup>a</sup>        | age_calculated             | .019          | .015   | 1.465  | 1      | .226   | 1.019               | .988  | 1.050 |       |
|                            |                            | Log_deltaHIF               | -.740         | .343   | 4.650  | 1      | .031   | .477                | .243  | .935  |       |
|                            |                            | heart_failure              | .631          | .402   | 2.460  | 1      | .117   | 1.879               | .854  | 4.131 |       |
|                            |                            | bmi                        | .028          | .033   | .709   | 1      | .400   | 1.028               | .964  | 1.097 |       |
|                            |                            | Constant                   | -3.677        | 1.469  | 6.264  | 1      | .012   | .025                |       |       |       |
| Step 8 <sup>a</sup>        |                            | age_calculated             | .018          | .015   | 1.353  | 1      | .245   | 1.018               | .988  | 1.049 |       |
|                            |                            | Log_deltaHIF               | -.726         | .341   | 4.531  | 1      | .033   | .484                | .248  | .944  |       |
|                            |                            | heart_failure              | .609          | .401   | 2.311  | 1      | .128   | 1.839               | .838  | 4.033 |       |
|                            |                            | Constant                   | -2.824        | 1.039  | 7.394  | 1      | .007   | .059                |       |       |       |
|                            |                            | Step 9 <sup>a</sup>        | Log_deltaHIF  | -.739  | .342   | 4.663  | 1      | .031                | .477  | .244  | .934  |
|                            |                            |                            | heart_failure | .633   | .400   | 2.507  | 1      | .113                | 1.883 | .860  | 4.124 |
|                            | Constant                   |                            | -1.650        | .192   | 73.721 | 1      | <.001  | .192                |       |       |       |
|                            | Step 10 <sup>a</sup>       |                            | Log_deltaHIF  | -.712  | .341   | 4.366  | 1      | .037                | .491  | .252  | .957  |
|                            |                            |                            | Constant      | -1.541 | .174   | 78.085 | 1      | <.001               | .214  |       |       |

a. Variable(s) entered on step 1: female\_male, age\_calculated, Log\_deltaHIF, treatment\_for\_diabetes, treatment\_for\_hypertension, heart\_failure, pre.op\_atrial\_fibrillation, coronary\_artery\_disease, bmi, preop\_eGFR.
